# Supplementary material for: The Correlation Between Circulating Ghrelin and Insulin Resistance in Obesity: A Meta-Analysis
Source: PubMed Central journal article supplement (PMC6160589; doi:10.3389/fphys.2018.01308), 2018-09-21
Supplement: Table_1.pdf [file Table_1.pdf]

## A Quality assessment of included Cross-Sectional studies

| study                  | A | B | C | D | E | F | G | H | I | J | K | Total |
|------------------------|---|---|---|---|---|---|---|---|---|---|---|-------|
| Afify <i>et al.</i>    | 1 | 1 | 0 | 1 | 1 | 0 | 1 | 1 | 0 | 0 | 0 | 6     |
| Al Qarni <i>et al.</i> | 1 | 1 | 1 | 1 | 1 | 0 | 1 | 1 | 0 | 0 | 0 | 7     |
| Bellone <i>et al.</i>  | 1 | 1 | 0 | 1 | 1 | 0 | 1 | 1 | 0 | 0 | 0 | 6     |
| Homaee <i>et al.</i>   | 1 | 1 | 0 | 1 | 1 | 0 | 1 | 1 | 0 | 1 | 0 | 7     |
| Ikezaki <i>et al.</i>  | 1 | 1 | 0 | 0 | 1 | 0 | 1 | 0 | 0 | 0 | 0 | 4     |
| Pedrosa <i>et al.</i>  | 1 | 1 | 0 | 1 | 1 | 1 | 1 | 1 | 1 | 1 | 1 | 10    |
| Stepien <i>et al.</i>  | 1 | 1 | 0 | 1 | 1 | 1 | 1 | 0 | 0 | 1 | 0 | 7     |
| Wadden <i>et al.</i>   | 1 | 1 | 0 | 1 | 1 | 1 | 1 | 1 | 0 | 0 | 0 | 7     |

A: Define the source of information (survey, record review); B: List inclusion and exclusion criteria for exposed and unexposed subjects (cases and controls) or refer to previous publications; C: Indicate time period used for identifying patients; D: Indicate whether or not subjects were consecutive if not population-based; E: Indicate if evaluators of subjective components of study were masked to other aspects of the status of the participants; F: Describe any assessments undertaken for quality assurance purposes (e.g., test/retest of primary outcome measurements); G: Explain any patient exclusions from analysis; H: Describe how confounding was assessed and/or controlled; I: If applicable, explain how missing data were handled in the analysis; J: Summarize patient response rates and completeness of data collection; K: Clarify what follow-up, if any, was expected and the percentage of patients for which incomplete data or follow-up was obtained.

## B Quality assessment of included case-control studies

| study                | A | B | C | D | E | F | G | H | Total |
|----------------------|---|---|---|---|---|---|---|---|-------|
| Hamed <i>et al.</i>  | 1 | 1 | 0 | 1 | 1 | 1 | 1 | 0 | 6     |
| Methak <i>et al.</i> | 1 | 1 | 0 | 1 | 1 | 1 | 1 | 0 | 6     |

A: The case definition is adequate; B: Representativeness of the cases; C: Community controls; D: No history of disease in controls; E: Comparability of cases and controls on the basis of the design or analysis; F: Ascertainment of exposure include secure record or structured interview where blind to case/control status; G: Same method of ascertainment for cases and controls; H: Same non-response rate for both groups.
